# Supplementary material
Source: publisher figshare collection journal article supplement (https://sage.figshare.com/ndownloader/files/22256727)
Supplement: Supplementary file 1 [file 22256727]

*El “Verano Boricua”: Claves desde la mirada de los derechos humanos*

José Javier Colón Morera

No hay descanso alguno en la lucha a favor de los derechos humanos. Quizá estemos condenados a la ardua y sísifica tarea de abogar sin cesar por los derechos y libertades de las razas menospreciadas y los pueblos marginados, por las mujeres y los hombres torturados, por los silenciados, por los desaparecidos

El “verano boricua[[1]](#footnote-2)” de 2019, como se ha designado a la serie de manifestaciones populares en contra la administración del entonces gobernador de Puerto Rico, Ricardo Rosselló Nevares, entre junio y agosto de 2019, es un evento social complejo. Puede y debe ser analizado desde las ciencias sociales para extraerle lecciones y opciones de futuro. Algunos de sus coordenadas son muy particulares del contexto social de una de las últimas colonias del mundo que lucha por su descolonización plena y por ampliar su ámbito democrático en medio de una agenda de austeridad sobre sectores vulnerables intensa con repercusiones demográficas significativas (Rivera Ramos, 2019, Colon Morera, 2016, Negrón Muntaner, 2018), pero otras apuntan a una nueva activación anti neoliberal propia de contextos muy diversos y con elementos transnacionales significativos. (Cotto Morales, 2020).

En Puerto Rico este evento único es parte de un proceso de largo alcance de apoderamiento ciudadano, intentando salir de diversos modos del entrampamiento colonial (Colón Ríos, 2016, Fonseca, 2019, Negrón Muntaner, 2018) del llamado Estado Libre Asociado[[2]](#endnote-2). Por todo ello, estimula nuevas miradas y devela los retos enormes que implica fotografiar un cuerpo en pleno movimiento.[[3]](#endnote-3)

Se ha sugerido que, por su diversidad y creatividad (Colón Rodríguez, Rodríguez López, 2019), el movimiento que logró sacar al Gobernador de Puerto Rico de su posición electiva (entonces líder del Partido Nuevo Progresista, NPP, por sus siglas en inglés), constituye un modelo de acción ciudadana[[4]](#endnote-4). Otros, por su parte, destacan su carácter principalmente no violento (Pita, 2019). Al mismo tiempo el tema plantea, como toda activación plenamente plural desde la ciudadanía, cuestionamientos enormes sobre sus variadas potenciales evoluciones políticas futuras.[[5]](#endnote-5) Su tangencia con el discurso internacional de los derechos humanos y por una democracia más participativa es, sin embargo, innegable (Reyes Gil, 2019, Colon Ríos, 2016). Por todo ello ya existen varias elucidaciones muy variadas y ricas en contrastes.[[6]](#endnote-6) Este ensayo se inserta en ese proceso vivo de reflexión intentando colaborar en el desarrollo de una *praxis efectiva* de cambio social y descolonización en un escenario de transformación particularmente desafiante (Negron Muntaner, 2018, Ayala, Bernabe, 2011) Pretendo también puntualizar ciertas miradas alternativas que abren espacio a nuevas y prometedoras elaboraciones.

La tangencia de lo sucedido en el verano de 2019 con el movimiento internacional a favor de los derechos humanos y su foco en la defensa de la dignidad humana es evidente. Tal protección, objeto central de la disputa por los derechos humanos, es, en el criterio del renombrado intelectual alemán Jürgen Habermas, un sismógrafo esencial que capta la existencia de múltiples violaciones al esfuerzo continuo por el desarrollo pleno de la personalidad humana:

… the experience of the violation of human dignity has performed, and can still perform, an inventive function in many cases: be it in view of the unbearable social conditions and the marginalization of impoverished social classes; or in view of the unequal treatment of women and men in the workplace, and of discrimination against foreigners and against cultural, linguistic, religious, and racial minorities; or in view of the ordeal of young women from immigrant families who have to liberate themselves from the violence of a traditional code of honor; or finally, in view of the brutal expulsion of illegal immigrants and asylum seekers. In the light of such specific challenges, different aspects of the meaning of human dignity emerge from the plethora of experiences of what it means to be humiliated and be deeply hurt. .” (Habermas, 2010)[[7]](#endnote-7)

En el verano de 2019 ocurrió que los ataques a la dignidad provenientes de un sector del poder gubernamental generaron una respuesta social formidable. Aconteció lo que ya para algunos parecía improbable: un movimiento plural gigante y solidario adornado por miles de banderas de Puerto Rico en un contexto masivo de voces y reclamos.[[8]](#endnote-8)

El investigador puertorriqueño Félix Córdova Iturregui lo ha descrito bien:

La movilización de este verano ha sido única en nuestra historia. Su sacudida sacó un gobernador de su silla. Para lograrlo puso en movimiento algo más fuerte que una elección organizada en los moldes de la colonia. Hubo una acción directa de pueblo, ocupando las calles, desbordando las calles, de día y de noche, creando nuevos escenarios de acción, con una voz enorme, pero repartida y al mismo tiempo unánime en sus dos reclamos principales: Ricky renuncia y llévate a la Junta (Córdova Iturregui, 2019)[[9]](#endnote-9)

Fue montado en este criterio de la defensa de la dignidad humana, así entendido, que se disparó una poderosa respuesta social. Al incorporarse demandas denunciando una variedad de medidas de tipo neoliberal que detallaremos en breve, este movimiento se ocupó de otorgarle centralidad a la justicia social como elemento clave del disfrute real de los derechos humanos. Este es un tema central que ha subestimado el movimiento internacional de derechos humanos a fines del pasado siglo y al comienzo de este (Moyn, 2018).

*Un movimiento social de amplia trayectoria*

Los movimientos sociales en Puerto Rico, como se ha investigado, han sido decisivos en el pasado en conseguir avances sociales de importancia (Cotto Morales 2014, 2019). La historia de protesta ciudadana durante el siglo XX y principios del XXI es significativa e imposible de agotar aquí. Tal fue el caso de los llamados “rescatadores de terrenos” principalmente en la década de los setentas promoviendo su derecho a la vivienda.[[10]](#endnote-10) Ello ha marcado la personalidad de los espacios urbanos de forma dramática y a veces desconocida. También han sido significativos los movimientos en favor de prevención de la violencia contra la mujer y en favor de la participación igualitaria de esta en los procesos políticos, en pro de la justicia ambiental y por el respeto y la inclusión de la comunidad LGTTBQ, y en oposición al militarismo[[11]](#endnote-11) Una multiplicidad de esfuerzos desde el ámbito laboral en contra de propuestas neoliberales de privatización también nos refiere a una larga de resistencia contra la opresión social.[[12]](#endnote-12) Las manifestaciones a favor de la autodeterminación nacional e independencia serían materia para examinar en otro escrito pero muchas de ellas han sido muy masivas en décadas pasadas y han incluido también variados reclamos de derechos humanos (Nieves Falcón, 2009).

En este caso el objeto de la movilización estaba claramente delimitado, aunque el espectro de asuntos era más amplio. Por vez primera, desde que se aprobó la Ley de Gobernador Electivo en 1947[[13]](#endnote-13), un gobernador electo con sólo el 41 porciento de los votos, se veía obligado a abandonar las funciones de su cargo. Por encima de la lógica legalista de que solo se podía esperar a las elecciones para remover a quién nos gobierna, prevaleció, para sorpresa de muchos, la voz democrática.[[14]](#endnote-14)

De hecho, los eventos del verano del 2019 provocaron una importante discusión pública sobre las bondades y limitaciones de nuestro ordenamiento constitucional interno el cual no tiene, por ejemplo, espacio para revocar el mandato (“*recall*”) de un gobernador en funciones.[[15]](#endnote-15) Con ello se fortaleció el criterio entre estudiosos y académicos de que el momento debería ser aprovechado para, por lo menos, repensar la Constitución del ELA de 1952 y examinar qué cambios requiere después de más de 60 años de vida para ampliar el limitado ámbito democrático que provee.[[16]](#endnote-16)

*Un levantamiento social sorprendente*

Un levantamiento social contestatario exigiendo formas de gobernar más democráticas, al margen de la mentalidad colonial, el machismo, el elitismo, la corrupción y la aporofobia fue el saldo positivo de este conflicto. Como bien ha dicho la escritora Ana Teresa Toro, ello: “Fue producto de una revolución pacífica que mantuvo al país en un estado de protesta permanente durante casi dos semanas (Toro, 2019).”

Luego del trauma social que representó el embate del huracán María[[17]](#endnote-17), con su penosa respuesta gubernamental, y de la continua aplicación de políticas de austeridad recortando derechos sociales importantes de la población, la solidaridad social ofrecía rutas reivindicativas de acción alterna. Los jóvenes, como la generación de “yo no me dejo”, fueron protagonistas. A su lado, en contraste, también marchaban miles de pensionados afectados por políticas de austeridad implantadas. Ese fue, por tanto, un acto de auténtica *soberanía popular* desempeñado desde el ejercicio básico de la libre expresión y asociación. Se reclamó una gobernanza ética, transparente y verdaderamente comprometida con la justicia social. Se elaboró de este modo una práctica política interseccional que podría tener mucho que decir sobre el futuro (Tormos, 2017).

Lo sorprendente de la lucha social desatada tiene mucho que ver, de acuerdo a Yara Maite Colón Rodríguez y Luz Marie Rodríguez López, con la forma novel en que se utilizaron los espacios urbanos. En un incisivo ensayo digital las autoras apuntan:

… hasta el momento no se ha desarrollado ninguna discusión informada sobre el rol que jugó el espacio dentro de las estrategias de insurgencia. Debido a que Puerto Rico estuvo y está enmarcado en un complejo esquema de policrisis - colonialismo/colonialidad, pobreza, la deuda pública y las repercusiones de los huracanes Irma y María, entre otras–, la rabia y la indignación, así como expresiones colectivas de amor y euforia, detonaron nuevos tipos de activismo que exhibieron múltiples modos de desobediencia en contra de las actuales políticas corporales de la autoridad. Las manifestaciones tomaron la forma de acciones dramáticas típicas y atípicas que tenían el objetivo de manifestar la oposición a los sistemas e instituciones políticos, económicos, religiosos y/o educativos opresivos (Colon Rodríguez, Rodríguez López, 2019)”.

Vale la pena citarlas nuevamente por lo refrescante y profunda que resulta su particular mirada de los eventos. En ella se resume de forma pormenorizada el valor de cómo se ocupó de forma creativa el espacio público de protesta:

Del 13 al 24 (…de julio de 2019…) (y más), los ciudadanos participaron en varias formas de disenso, mayormente, aunque no únicamente, en los centros urbanos o los espacios públicos. Además de los cascos urbanos, la gente reclamó los espacios suburbanos (las urbanizaciones privadas y los centros comerciales), los espacios de transportación o de infraestructura (los puentes, las carreteras periféricas, las autopistas y el aeropuerto) y los espacios naturales (las playas y la Bahía de San Juan). Todos ellos se reconocieron como emplazamientos propios para declarar la oposición. Hasta en los espacios virtuales (las redes sociales) se canalizó activamente la indignación convirtiéndola en movilización. Las manifestaciones comenzaron a organizarse orgánicamente también por la diáspora puertorriqueña, en distintas ciudades de Estados Unidos, Europa, América Latina y otras geografías. Por eso, es importante subrayar que las protestas que se han venido agrupando bajo el término de *Verano Boricua* expusieron –cuando se comparan con ejercicios previos– una descentralización sin precedentes, donde la típica táctica de apropiación espacial se incorporó de un modo atípico a partir de acciones ubicuas autoconvocadas por varias muestras representativas de diversos grupos de ciudadanos. La noción antropológica de “tribus” nos parece útil para describir el fenómeno. Sumado a esto, las manifestaciones fueron excepcionalmente orgánicas (Colón Rodríguez, Rodríguez López, 2019).”

*El detonante inmediato y su contexto*

Esta explosión social en este archipiélago de islas que constituye Puerto Rico tuvo un detonante inmediato y una serie de eventos que, coincidiendo en el tiempo crearon una situación insostenible para el Gobernador Rosselló Nevares y su centro de apoyo más cercano. Al igual que en el caso de Vieques, cuando la muerte accidental provocada por los ejercicios militares de la Marina de EEUU de David Sanes, provocó un estremecimiento y una serie de protestas, aquí también hubo un evento que marcó un antes y un después.[[18]](#footnote-3)

El 8 de julio de 2019 se comenzó a dar a conocer un “chat” (conversación digital) confidencial entre el Gobernador Rosselló Nevares y su grupo de colaboradores varones más cercanos y de mayor confianza. Su publicación minó para siempre la confianza entre el gobernante y los gobernados. Como señala el profesor de ciencia política, Dr. Raúl Cotto Serrano, esa conversación entre el gobernador y su círculo íntimo fue la gota que colmó la copa de la población y fue también la que ayudó a darle un color despreciable al conjunto de su gestión del gobierno (Colon Morera, *Radio Universidad, 2019*).

Semanas antes, el 24 de junio, la prensa en Puerto Rico informaba que el Secretario de Hacienda y principal oficial financiero del gobierno, Raúl Maldonado, había denunciado la existencia de “una mafia” en la propia agencia administrativa que él dirigía y que estaba dedicada a diversas formas de corrupción, tal reportado por *El Nuevo Día* (Junio 24, 2019). Días después se informaba también sobre la radicación de cargos criminales federales contra dos oficiales de alto rango del gabinete del gobernador Rosselló. Estas dos funcionarias estaban a cargo de las dos agencias de mayor presupuesto e impacto social en Puerto Rico: la exdirectora ejecutiva de la Administración de Seguros de Salud (ASES), Ángela Ávila, la exsecretaria de Educación, Julia Keleher y otros cuatro acusados. Un gran jurado federal las “acusó por conspiración para cometer fraude, robo, fraude electrónico, conspiración para incurrir en lavado de dinero y lavado de dinero (Figueroa Cancel, 2019).”

El Gobernador había invertido mucho capital político en defender la figura de la secretaria de educación Keleher, aunque esta funcionaria tenía niveles de desaprobación popular muy altos en encuestas de opinión. La cantidad de escuelas públicas en comunidades pobres que Julia Keleher ordenó cerrar de forma permanente durante su gestión, y la forma atropellada en que lo hizo, la exorbitante compensación de $250,000 que recibía y su modo de proceder arrogante, provocaron múltiples pedidos públicos al Gobernador para que la despidiera. Este se negó, sin embargo, a la presión ciudadana, pero se vio obligado, finalmente, a forzar su salida cuando ya se sabía que pesaban contra ella las acusaciones criminales federales ya aludidas.

Entre los participantes del chat de cerca de 900 páginas se encontraban el Gobernador, creador del mismo, el secretario de la Gobernación, Ricardo Llerandi, Elías Sánchez, amigo personal del Gobernador y exdirector de su campaña electoral, Alfonso Orona, quien se había desempeñado como asesor legal del Gobernador y Director Ejecutivo de AaFaF[[19]](#endnote-18); Carlos Bermúdez y Rafael Cerame, asesores en comunicaciones del gobierno; y el publicista Edwin Miranda, contratista privado de una compañía de publicidad quien contaba con múltiples contratos en agencias del gobierno, entre otros.

Uno de las acciones más objetables del chat fue la burla relacionada al tema de los casi 3,000 muertos del huracán María. El sufrimiento de miles de familias se convertía en el referido chat en objeto de burla. Pocas expresiones generaron tanto malestar como las referencias cínicas sobre los muertos del huracán María: “En el chat que mantiene el jaque al gobernador, Sobrino, uno de sus asesores principales, intervino cuando discutían el retraso en el Negociado de Ciencias Forense. ‘¿No tenemos algún cadáver para alimentar a nuestros cuervos?’ (Rivera Sánchez, 2019).”

*El chat ofrece una mirada única a la operación del Gobierno*

En el intercambio privado entre los funcionarios y contratistas del gobierno se develó como confidencialmente funcionarios públicos y personas representando intereses privados discutían asuntos altamente confidenciales. Confiados de que la comunicación entre los participantes era secreta, las más de ochocientas páginas filtradas a la prensa estuvieron repletas de frases vulgares, machistas, malas palabras, insultos, violentas, homofóbicas y contra la población pobre. Por ejemplo, se le llamó prostituta a la líder demócrata en el estado de Nueva York, Mark Viverito. Indignada la ex asambleísta de Nueva York contestó: "Una persona que usa ese lenguaje contra una mujer no debería gobernar a Puerto Rico (*Sánchez, 2019*).” En dichos intercambios cibernéticos se discutían también medidas para confundir la opinión pública y manipular sondeos de los medios de prensa y radio. En el mismo chat el propio gobernador se jactaba de tomar por estúpidos a sus correligionarios, pero utilizando una palabra soez al decir: “cogemos de pen… hasta los nuestros (*Noticel, 2019*).”

En esta conversación privada entre los más allegados al gobernador también hubo chistes homofóbicos en contra del cantante Ricky Martin y contra las feministas. Era como si se virara la Carta de Derechos de la Constitución al revés y se hiciera todo lo contrario de lo que establece dicho ordenamiento normativamente en materia de derechos civiles. El cantante Ricky Martin resumió bien la situación: “Gobernador, sus insultos y sus burlas nos muestran quien es usted realmente. Precisamente porque sus comentarios fueron hechos en la intimidad queda demostrado de que está hecho. Es en la intimidad donde se vive con la verdad e integridad que nos define y la suya está lejos de ser una vertical y admirable (*Vicente, 2019*).”

Algunos de los comentarios registrados en los documentos confidenciales mostraban tendencias elitistas proyectando un sentido de superioridad social. En uno de los intercambios el propio gobernador se burlaba de una residencia pobre, a plena vista en la vecindad de la residencia de descanso del Gobernador en Cayey, comentando despectivamente: “Mis vecinos en la montaña. Así no se puede pedir la estadidad (*Sepulveda, 2019*).”

Tampoco ayudó al gobierno una serie de apariciones de Douglas A. Leff, Director del Negociado Federal de Investigaciones (FBI por sus siglas en inglés) en Puerto Rico anteriores a los arrestos de las funcionarias y contratistas. En una conferencia llevada a cabo el 30 de mayo de 2019 este advirtió: "Vamos a darle pon en el asiento trasero de una guagua del FBI a los corruptos" (Notiuno, 2019)

En este contexto, algunos observadores entienden que el Gobernador cometió un gran error cuando hizo expresiones ante la importante cadena de noticias *CNN,* en el sentido de que el Presidente Trump era un “bully” (acosador) y que “'If the bully gets close, I'll punch the bully in the mouth' (Acosta, Liptack, 2019) ” Nunca antes un gobernador en funciones se había expresado de esa forma tan despectiva y violenta sobre un presidente estadounidense. Ello podría ayudar a explicar, parcialmente, porque se intensificaron las investigaciones, las amenazas y los arrestos a allegados cercanos del propio gobernador. Las fuertes denuncias del FBI sobre la corrupción rampante contribuyeron, sin duda, a facilitar el final del gobierno de Rosselló Nevares.

*La revolución ciudadana*

Ante este cuadro de corrupción la ciudadanía comenzó a protestar en las variadas formas ya mencionadas. El nivel de legitimidad del gobierno insular había tocado fondo. Al comienzo cientos de personas fueron agrupándose en los alrededores de La Fortaleza, en el Viejo San Juan, a corear consignas y a formar piquetes de protesta. En esta convocatoria inicial figuró de forma prominente la *Colectiva Feminista*, organización que había sido objeto de los comentarios machistas y homofóbicos en el referido chat. Central también fue el activismo de los jóvenes bajo la consigna de que, ante los abusos del gobierno, “yo no me dejo”.

Poco a poco, los tamaños de las manifestaciones en la zona histórica del Viejo San Juan fueron aumentando hasta llegar a la gran actividad llevada a cabo el 22 de julio en las inmediaciones del centro comercial de Plaza Las Américas en Hato Rey de aproximadamente medio millón de personas[[20]](#endnote-19). Lo sucedido en las inmediaciones de La Fortaleza, y luego en el llamado Expreso Las Américas, fue impresionante en cuanto a la fuerza y la diversidad del reclamo. Un elemento que contribuyó a la masividad de la convocatoria tuvo que ver con la participación de artistas y personalidades que se sumaron al pedido de renuncia del Gobernador y a la convocatoria de protestar en las calles. Artistas como Benito Antonio Martínez Ocasio (Bad Bunny), con cerca de 18 millones de seguidores en las redes sociales, así como Ricky Martin, René Pérez conocido como "Residente", Olga Tañón, Ednita Nazario, Kany García, Tommy Torres, para solo citar algunos, crearon un espacio de convocatoria novedoso y nunca antes visto. Todos ellos son figuras muy queridas en Puerto Rico tanto por su calidad artística como por su compromiso ciudadano con diversos reclamos.

Para tal convocatoria se utilizaron las redes sociales. Este es un desarrollo común en las campañas internacionales de derechos humanos.[[21]](#endnote-20) Estas son: “herramientas tales como las redes sociales, los videos documentales, el periodismo ciudadano y la educación virtual han acelerado cambios políticos, reduciendo las desventajas de información de los grupos marginados y facilitado la acción conjunta de activistas a través de las fronteras (Boaventura de Sousa).”

Agrupaciones tan diversas como motoristas convocados por un líder comunitario como “Rey Charlie” hasta coros universitarios, se unieron al reclamo. Feministas al lado de sacerdotes progresistas, cantantes y artistas junto a estudiantes universitarios, buzos en el mar y seguidores del yoga, en motora y en bicicleta, sindicatos, cooperativistas, todos desde su identidad particular, articuló un demos, es decir una comunidad organizada para defender el interés común. Esa diversidad de convocados coexistió con una gran variedad expresiva: las consignas tradicionales y las nuevas eran gritadas o cantadas junto con lectura de cuentos, con coros o con “cacerolazos” en los vecindarios donde los ciudadanos se hacían sentir desde sus hogares. Además, se integró el llamado *perreo* combativo al menú de formas de expresión de los jóvenes. Consignas como “Ricky renuncia y llévate a la Junta” también expresaban que la protesta iba dirigida contra las medidas de austeridad tomadas por la Junta de Control Fiscal designada por el Gobierno Federal de Estados Unidos (Caballero).

Interesantemente, uno de los elementos clave de este proceso fue la relativa ausencia de los partidos políticos principales en este conflicto. El partido de gobierno no pudo enfrentar la crisis de forma adecuada ya que se mostraron graves diferencias internas sobre el curso de acción a tomar. Además, el PNP había apoyado muchas de las medidas que sostenían las políticas de austeridad de y se encontraba distanciado del pueblo tal como revelado por el chat. El Partido Popular Democrático (PPD), otro partido principal en la isla, se proyectó también de forma débil. El hecho de que el PPD había igualmente participado en las de esquemas de corrupción e inversionismo político lo hacían lucir con poca credibilidad para liderar los esfuerzos para promover la trasparencia y el activismo ciudadano exigido. Otras agrupaciones de menor tamaño como el Partido Independentista Puertorriqueño (PIP) y el recién creado Movimiento de Victoria Ciudadana estuvieron presentes de forma secundaria en las manifestaciones.

La presión politica ciudadana tuvo su foco principal la residencia oficial y sede principal del poder ejecutivo: La Fortaleza (también conocido como el “Palacio de Santa Catalina”). Nunca antes se había visto a la ciudadanía cercando todo el perímetro de la sede de poder gubernamental de forma simbólica y real. Las fotos de manifestación llevada a cabo el 22 de julio de 2019 en el Expreso Las Américas fue muestra clara de la extraordinaria masividad alcanzada. Por primera vez en la historia una movilización que dependió, en gran medida, de las redes sociales como forma de convocatoria principal, y las personas que la convocaron estaban fuera del espectro de la política partidista, lograba unir a sectores muy diversos de la sociedad.

Esa marcha del 22 de julio fue crucial para determinar los eventos futuros. Félix Córdova lo explica muy bien : “La marcha del 22 de julio reafirmó el dictamen popular del miércoles anterior. La enseñanza de estos dos momentos cruciales fue decisiva: los dos cuerpos legislativos tuvieron que manifestarse no ya sobre la posibilidad de residenciar al gobernador, sino de la necesidad de hacerlo. Por tanto, la acción de la legislatura no nació en la legislatura. Fue el resultado inequívoco de lo que sucedía en la calle. Allí, en el amplio escenario público se desplegaba una voluntad que adquiría cada día más fuerza en la inagotable creatividad de su reclamo (Córdova Iturregui, 2019).”

Un gobernador que había obtenido solo el 41 por ciento de los votos en las elecciones, con su oposición dividida entre diferentes candidatos, y que había manejado de forma torpe e insensible la crisis del huracán María, se encontró absolutamente aislado en medio de una grave crisis de legitimidad. Mientras que la ciudadanía estaba sólidamente en favor de la renuncia, lideres importantes del propio partido de gobierno (NPP) se unieron al pedido de renuncia. Cuando el más importante líder municipal del NPP, Ramón Luis Rivera, solicitó al Gobernador que accediera a renunciar a su cargo, muchos observadores reconocieron que ya el dique se había roto y que ya nada iba a detener el descontento en las calles.

El 25 de julio de 2019, el Gobernador anunciaba, mediante un video, su renuncia al cargo. Fue un momento dramático debido a la celebración de miles de personas que esperaban ansiosamente el anuncio que confirmaba la victoria de una de las movilizaciones sociales más exitosos de la historia. Al igual que lo sucedido con Vieques, donde un movimiento de desobediencia civil llevo a la salida de la marina estadounidense de la isla, décadas atrás el asunto tuvo una cubierta internacional impresionante. En Estados Unidos no pocos comentaristas hicieron referencia a que la oposición al Gobernador Rosselló había sido mucho más creativa que la expresada por la sociedad estadounidense en contra de los excesos del Presidente Trump.

*En vez de una conclusión*

La lucha que se escenificó en Puerto Rico es esencialmente un momento, particular y significativo, de una lucha por los derechos humanos vistos estos en una dimensión amplia. Debe ser vista como parte de un proceso de la creación de un modelo de participación democrática real y conducente a la representación efectiva de los excluidos del proceso político presente. Cómo va a tomar forma concreta ese reclamo todavía es difícil de precisar o anticipar. Falta ver si las asambleas ciudadanas en diversos pueblos podrán articular un programa de reivindicaciones mínimas pero en cualquier caso siguen operando diversas organizaciones no gubernamentales de influencia significativa, de amplia resonancia en la opinión pública y de una agenda de derechos humanos muy diversa.

Lo que sí es claro es el “verano boricua” resultó ser una manifestación intensa enfocada en reivindicar la dignidad humana vista esta como expresión de la personalidad humana en sus distintas manifestaciones e identidades diversas. Su naturaleza y estrategia interseccional es muy prometedora dándole visibilidad a una multiplicidad de fuentes de discrimen y orpesion. Demostró una capacidad de acción ciudadana conjunta que puede clave para seguir mirando el futuro como una oportunidad. Este ha sido, sin duda, un momento democrático en Puerto Rico lleno de potencialidades.

NOTAS

1. Boricua is the way the original *taíno* population named the Island that later on would become Puerto Rico . At the present time Puerto Ricans refer to one another as “boricuas” as a symbol of national pride. See: Ivonne Acosta Lespier, *Enciclopedia de Puerto Rico*, <https://enciclopediapr.org/encyclopedia/breve-historia-de-puerto-rico/> [↑](#footnote-ref-2)
2. EL ELA es como se designa formalmente la relación politica presente entre Estados Unidos y Puerto Rico. Legalmente ha sido definida por los tribunales de EEUU como un territorio que pertenece a pero no forma parte de Estados Unidos. Ver: José Trias Monge, *Puerto Rico: The Trials of the Oldest Colony in the World*, Yale University Press, 1999). [↑](#endnote-ref-2)
3. Hay variadas interpretaciones de un evento tan reciente como este. La antropóloga Yarimar Bonilla cuando hace referencia a las actitudes de los jóvenes participantes en las protestas de julio de 2019: “So I think the young people here are saying, ‘Let’s set aside the question of sovereignty, and let’s focus on the schools; let’s focus on health; let’s focus on a plan for Puerto Rico.’ And I don’t think it’s because they don’t want sovereignty. It’s because they don’t see the U.S. being willing to change the relationship that they have here. And so they want to tackle what’s going on right now and here.”, “The Frustration Behind Puerto Rico’s Popular Movement”, *The New Yorker*, <https://www.newyorker.com/news/q-and-a/the-frustration-behind-puerto-ricos-popular-movement>. [↑](#endnote-ref-3)
4. De forma interesante, y hasta cierto modo paradójica, varios medios estadounidenses progresistas observaron con atención la efectividad del reclamo en Puerto Rico en contraste con los problemas para forzar el residenciamiento del Presidente Donald J. Trump en aquel país. Ver por ejemplo: “Colonial Uprising: The protests that brought down Puerto Rico’s governor are also about the island’s troubled relationship with the mainland”, *Slate*, 25 de julio de 2019.

   <https://www.newyorker.com/news/q-and-a/the-frustration-behind-puerto-ricos-popular-movement>. [↑](#endnote-ref-4)
5. Se ha desatado una polémica sobre si la próxima movida ciudadana frente a las elecciones del 2020 debe ser el promover candidatura independiente en oposición a los partidos existentes. Sobre esta controversia se puede ver: Rafael Bernabe, “¿Candidaturas independientes o nuevos movimientos?”, *80 grados*, 30 de agosto de 2019.

   <http://www.80grados.net/candidaturas-independientes-o-nuevos-movimientos/>. [↑](#endnote-ref-5)
6. Una entrevista a la antropóloga puertorriqueña Yarimar Bonilla es relevante en este proceso en curso. Ver: Isaac Chotiner, “The Frustration Behind Puerto Rico’s Popular Movement”, The New Yorker, 25 de julio de 2019. <https://www.newyorker.com/news/q-and-a/the-frustration-behind-puerto-ricos-popular-movement>. Merece mencionarse también las contribuciones del investigador Félix Córdova Iturregui. Ver: Félix Córdova Iturregui, “Un verano singular: la democracia en la calle”, *Red Betances*,

   <http://www.redbetances.com/component/content/article/51-en-portada/3354-2019-08-25-22-24-15.html>. Sobre la participación de los llamados jóvenes “centennials”, ver Gerardo E. Alvarado León, “Los ‘centennials’ lucharán por un mejor país”, *El Nuevo Día*, 18 de agosto de 2019. <https://www.elnuevodia.com/noticias/locales/nota/loscentennialslucharanporunmejorpais-2512474/>. El profesor Rafael Bernabe también ha producido reflexiones interesantes: Rafael Bernabe y Manuel Rodríguez Banchs, “Verano 2019: balances y perspectivas”, *80 grados*, <http://www.80grados.net/verano-2019-balances-y-perspectivas/>. [↑](#endnote-ref-6)
7. Jürgen Habermas, The concept of human dignity and the realistic utopia of human rights”,*Methaphilosophy*, Vol. 41, Issue 41. 2010. Este esun principio directivo de la Constitución de Puerto Rico y es elemento central de la Declaración Universal de Derechos Humanos proclamada por la Organización de Naciones Unidas en 1948. [↑](#endnote-ref-7)
8. Las muestras de nacionalismo cultural desplegadas en esta ocasión, por medio del despliegue de las banderas monoestrelladas, estuvieron acompañada en ocasiones por símbolos multicolores de las banderas de la comunidad LGTTBQ y de pancartas alusivas a la crisis fiscal o a demandas de diversos movimientos como el de las feministas. No se manifestó aquí, de ningún modo, un nacionalismo excluyente. [↑](#endnote-ref-8)
9. El nombre del Gobernador elector es Ricardo Rosselló Nevares, pero es conocido como “Ricky”. La “Junta” se refiere al organismo federal nombrado por el gobierno de Estados Unidos para establecer políticas de austeridad en Puerto Rico y resolver la crisis fiscal causada por una enorme deuda pública acumulada. [↑](#endnote-ref-9)
10. Liliana Cotto Morales, “El movimiento social urbano de los rescates de terreno”, *80 grados*, 25 de enero de 2019, <http://www.80grados.net/el-movimiento-social-urbano-de-los-rescates-de-terreno/>. Un tratado más elaborado del tema se consigue en: *Desalambrar: Orígenes de Los Rescates de Terreno En Puerto Rico y Su Pertinencia En Los Movimientos Sociales Contemporáneos*, Editorial Tal Cual (2006). [↑](#endnote-ref-10)
11. José Luis Méndez, “Puerto Rico y la lucha por la paz”, Conferencia Magistral 2011-2012

    Cátedra UNESCO de Educación para la Paz, Universidad de Puerto Rico. Ver: <http://unescopaz.uprrp.edu/act/Lecciones/2012Mendez/LaluchaporlapazPR.pdf>. [↑](#endnote-ref-11)
12. Félix Córdova Iturregui, “Un verano singular: la democracia en la calle”, Red Betances. Sobre los procesos neoliberales en curso: Naomi Klein, *The Battle For Paradise: Puerto Rico Takes on the Disaster Capitalists*, Haymarket Books (June 5, 2018). [↑](#endnote-ref-12)
13. Previo a la Ley de Gobernador Electivo en 1947, el presidente de los Estados Unidos nombraba al gobernador de la isla. Una vez pasada la ley, el gobernado empezó a ser elegido a través de elecciones en la isla. [↑](#endnote-ref-13)
14. La Constitución de Puerto Rico posee una amplia Carta de Derechos, pero no establece formas de participación politica directa de la ciudadanía. Ver: “Iniciativa, referéndum: Las experiencias estatales como modelo para Puerto Rico”, *Revista Jurídica UPR*, Vol. 83. Por el contrario, debido a que es una constitución sujeta a los poderes del Congreso de Estados Unidos se impide taxativamente utilizar los cambios a la misma para romper el control colonial. José Julián Álvarez, Derecho Constitucional de Puerto Rico y Relaciones Constitucionales con los Estados Unidos – Casos y Materiales, Editorial Temis S. A. (2010). [↑](#endnote-ref-14)
15. Esta es una de las enmiendas a la Constitución perseguida por ciertos sectores. En el 2018 una propuesta en este sentido fue recomendada favorablemente en la Cámara de Representantes. Ver: Resolución Concurrente de la Cámara C.2. <http://www.tucamarapr.org/dnncamara/Documents/Measures/6142ab24-5c71-4f1b-8890-9ebf5929da38.pdf>. [↑](#endnote-ref-15)
16. Las propuestas son variadas y provienen de distintos lugares del cuerpo social puertorriqueño. Algunas de las propuestas provienen de exgobernadores de Puerto Rico. Ver: Aníbal Acevedo Vilá, *Separación de poderes*,

    Acevedo Vilá discute en su nuevo libro la separación de poderes. Para una entrevista reciente sobre el particular con el autor ver: Benjamín Torres Gotay, *El Nuevo Día*, 31 de enero de 2019. <https://lite.elnuevodia.com/noticias/locales/nota/acevedoviladiscuteensunuevolibrolaseparaciondepoderes-2474170/>. El Colegio de Abogados de Puerto Rico ha promovido desde hace varias décadas un proceso de asamblea constitucional para promover la descolonización. Ver: Alejandro Torres-Rivera, *La Asamblea Constitucional de Estatus: alternativa para la revisión de las relaciones políticas entre Puerto Rico y Estados Unidos.* Puerto Rico: Editorial Procopio, 2014. Pero el nivel de interés ha crecido y ahora desborda el tema del estatus al interesarse en medidas dirigidas a ampliar la democracia directa. [↑](#endnote-ref-16)
17. El huracán María resultó en daños irreparables para la sociedad puertorriqueña. Se estima que cerca de 4 mil personas perdieron su vida como consecuencia del fenómeno ambiental y la pobre respuesta institucional. El gobierno local no pudo siquiera ofrecer datos confiables sobre el asunto. Un estudio inicial estableció la existencia de cerca de tres mil muertos. Ver: BBC Mundo, “Huracán María en Puerto Rico: por qué el número de víctimas pasó de 64 a casi 3.000 muertos”, <https://www.bbc.com/mundo/noticias-america-latina-45338937>. Luego un segundo estudio elevó la cifra a más de cuatro mil. Ver: John D. Sutter, Leyla Santiago, “El huracán María habría dejado más de 4.600 personas muertas en Puerto Rico: superando en miles las cifras oficiales”, CNN, 29 mayo, 2018. <https://cnnespanol.cnn.com/2018/05/29/huracan-maria-muertos-puerto-rico-cifra-total-harvard-estudio/>. [↑](#endnote-ref-17)
18. Para el contexto de la lucha por la desmilitarizacion de Vieques, ver: Jorge Rodr’iguez Beruff, Vieques y la construcción de un poder civil en Puerto Rico, *Nueva Sociedad*, No. 168, julio-agosto, 2000. [↑](#footnote-ref-3)
19. Agencia interna del gobierno encargada de poner en vigor políticas de austeridad en correspondencia con los mandatos de la Junta de Supervisión Fiscal. [↑](#endnote-ref-18)
20. “Para el geógrafo, planificador e interpretador de imágenes aéreas, Jardany Díaz Salgado, más de 500,000 personas acudieron al evento. Basó su cálculo en el análisis de imágenes tomadas con drones, desde edificios aledaños y en helicópteros, así como las difundidas por los medios.” Gerardo Alvarado León, “Marcha del pueblo: Puerto Rico clama la renuncia del gobernador Ricardo Rosselló. (2020). Retrieved 6 February 2020, from https://www.elnuevodia.com/noticias/locales/nota/marchadelpueblopuertoricoclamalarenunciadelgobernadorricardorossello-2507138/ [↑](#endnote-ref-19)
21. Una balanceada discusión de los beneficios y posibles usos perjudiciales de las redes se puede encontrar en: Sarah Joseph, “Social media, political change and Human Rights”, *Boston College International & Comparative Law Review*, Vol. 35:145,

    REFERENCIAS:

    Acosta, Jim, Liptak, Kevin, “Puerto Rico governor warns White House: 'If the bully gets close, I'll punch the bully in the mouth', CNN,

    <https://edition.cnn.com/2019/03/28/politics/ricardo-rossell-donald-trump-puerto-rico-funding/index.html>

    Alvarado León, Gerardo, “Marcha del pueblo: Puerto Rico clama la renuncia del gobernador Ricardo Rosselló. (2020),

    https://www.elnuevodia.com/noticias/locales/nota/marchadelpueblopuertoricoclamalarenunciadelgobernadorricardorossello-2507138/

    Ayala, C. J., & Bernabe, R. *Puerto Rico en el siglo americano: su historia desde 1898*. Ediciones Callejón. 2009.

    Bonilla, Yarimar. y Caraballo Cueto, José. “La Junta no es la solución”, El Nuevo Día, 4 de agosto de 2019, <https://www.elnuevodia.com/opinion/columnas/lajuntanoeslasolucion-columna-2509777/>.

    Colón Morera, José Javier, Puerto Rico: A Case of American Imperial Doubts?, https://revistajuridica.uprrp.edu/2016/06/13/puerto-rico-a-case-of-american-imperial-doubts/Colón Morera, Jose J., Alegría Ortega, Idsa, Puerto Rico y los derechos humanos, una intersección Plural, Ediciones Callejón. 2010.

    Colón Rodríguez, Yara Maite, Rodríguez López, Luz Marie, “(O)ponerse donde sea: Escenarios combativos de la indignación”, 80 grados, 18 de agosto de 2019, recuperado en

    <https://www.80grados.net/oponerse-donde-sea-escenarios-combativos-de-la-indignacion/>

    Colón Ríos, Joel, “Democratizar a Puerto Rico”, 85 *Rev. Jur. UPR* 857 (2016).

    Coco, Danica. “Puerto Rico Governor Resigns as Promised, Successor Sworn in”, NBC Los Angeles, <https://www.nbclosangeles.com/news/politics/puerto-rico-house-confirms-pierluisi-secretary-of-state-514289801.html>.

    Córdova Iturregui, Félix. “Un verano singular: la democracia en la calle”, *Red Betances*,

    <http://www.redbetances.com/component/content/article/51-en-portada/3354-2019-08-25-22-24-15.html>.

    Cotto Morales, Liliana, LAP essay in this book

    Cotto Morales, Liliana. “Movimientos sociales: otra mirada a la crisis”, *80 grados*, 8 de agosto de 2014.

    Cotto Morales, “El movimiento social-urbano de los rescates de terreno”, *80 grados*, 25 de enro de 2019,

    <https://www.80grados.net/el-movimiento-social-urbano-de-los-rescates-de-terreno/>

    Figueroa Cancel, Alex, “Acusan a Julia Keleher y Ángela Ávila por conspirar para cometer fraude y lavado de dinero”, *El Nuevo Día*, 10 de julio de 2019.

    Fonseca, Melody. “Beyond colonial entrapment: The challenges of Puerto Rican ‘National consciousness’ in times of Promesa”, *Interventions*, 2019.

    García, Gervasio L. “Reguetón se escribe con h (de Historia)”. *80 grados*, 20 de diciembre de 2019. <http://www.80grados.net/regueton-se-escribe-con-h-de-historia/>

    Laborde, Antonia. “La renuncia oficial de Rosselló no acalla las protestas en Puerto Rico”, El País, <https://elpais.com/internacional/2019/08/03/actualidad/1564786068_043313.html>.

    Moyn, Samuel, *Not enough, Human Rights in an Unequal World,* Belknap Press: An Imprint of Harvard University Press, 2018.

    Negrón-Muntaner, Frances. “The Emptying Island: Puerto Rican Expulsion in Post-Maria

    Time.” *Hemispheric-Institute*. 2019. <https://hemisphericinstitute.org/en/emisferica-14-1-expulsion/14-1-essays/the-emptying-island-puerto-rican-expulsion-in-post-maria-time.html>

    Nieves Falcón, Luis, *Un Siglo de Represión Politica En Puerto Rico: 1898-1998*, Ediciones Puerto; Segunda edición (2009).

    Ortiz, Jorge L. “Puerto Rico had three governors in a week. Now what?” USA Today,

    <https://www.usatoday.com/story/news/nation/2019/08/16/puerto-rico-3-governors-week-wanda-vazquez-stability/2025597001/>.

    Pita, Antonio. “Hong Kong, Sudán, Puerto Rico: la clave del triunfo de la no violencia. Tres casos de éxito recientes evidencian la eficacia de movilizar al menos a un 3,5% de la población”, *El País*, 6 de septiembre de 2019, ver:

    <https://elpais.com/internacional/2019/07/26/actualidad/1564142417_680728.html>.

    Reyes Gil,Yanira. “¿Y si construimos la Constitución que queremos…? Por un proceso constituyente anclado en los derechos humanos.” *Revista de Política Pública y Legislación UIPR Revista de Política Pública y Legislación UIPR*. Septiembre 2019. <http://www.derecho.inter.edu/wp-content/uploads/2019/10/AMICUS-Vol2-Num2-Septiembre2019.pdf>

    Rivera Clemente, Yaritza. “Revelan cargos contra Ávila, Keleher y otros cuatro acusados”, *El Vocero*, 10 de julio de 2019, Ver: <https://www.elvocero.com/ley-y-orden/revelan-cargos-contra-vila-keleher-y-otros-cuatro-acusados/article_7e695a56-a31a-11e9-8f3e-3f833493e5b6.html>.

    Rivera Pagán, Luis. “A la sombra del cadalso: reflexiones sobre la pena de muerte”, *80 grados*, 17 de mayo de 2019. Ver: <http://www.80grados.net/a-la-sombra-del-cadalso-reflexiones-sobre-la-pena-de-muerte/>.

    Rivera Ramos, Efrén. “Constitución y democracia”, *El Nuevo Día*, 20 de agosto de 2019, ver:

    <https://www.academiajurisprudenciapr.org/constitucion-y-democracia/>.

    Rivera Sánchez, Maricarmen. “Una “burla inaceptable” lo que dijo Sobrino sobre los muertos de María, *El Vocero*, 16 de julio de 2019.

    Rodríguez Beruff, Jorge, “Vieques y la construcción de un poder civil en Puerto Rico”, *Nueva Sociedad*, No. 168, julio-agosto, 2000.

    Rodríguez López, Luz Marie. y Rodríguez, Yara Maite Colón, “(O)ponerse donde sea: Escenarios combativos de la indignación”, *80 grados*,

    <http://www.80grados.net/oponerse-donde-sea-escenarios-combativos-de-la-indignacion/>.

    Sáncez, Rey, “Estos son algunos de los mensajes de chat filtrados que desataron la crisis política de Puerto Rico”, CNN en español, recuperado de

    <https://cnnespanol.cnn.com/2019/07/24/estos-son-algunos-de-los-mensajes-de-chat-filtrados-que-han-desatado-la-crisis-politica-de-puerto-rico/>

    Santos, Boaventura de Sousa. *Derechos humanos, democracia y desarrollo*, Bogotá: Centro de Estudios de Derecho, Justicia y Sociedad, Dejusticia, 2014.

    Sepúlveda, Barbara, “Gobernador se burla de la pobreza en su chat”, *El Vocero*, 14 de julio de 2019, recuperado de

    <https://www.elvocero.com/gobierno/gobernador-se-burla-de-la-pobreza-en-su-chat/article_9f0b132c-a69d-11e9-8e26-47918e630a04.html>

    Toro, Ana Teresa. “Puerto Rico ya no es el mismo país”, *New York Times*, julio 24, 2019, <http://www.justiceforviequesnow.org/2019/07/25/puerto-rico-ya-no-es-el-mismo-pais/>.

    Tormos, Fernando. *Intersectional solidarity, Politics, Groups, and Identities*, 5:4, 2017, 707-720.

    Vicente, Alfredo, “Por qué Ricky Martin, Bad Bunny y Residente piden la renuncia del gobernador de Puerto Rico”, Prensa Libre, recuperado en

    <https://www.prensalibre.com/vida/escenario/por-que-ricky-martin-bad-bunny-y-residente-piden-la-renuncia-del-gobernador-de-puerto-rico/>

    El Nuevo Día, “Mark Viverito: "Una persona que usa ese lenguaje contra una mujer no debería gobernar a Puerto Rico", *El Nuevo Día*, 11 de julio de 2019. <https://www.elnuevodia.com/noticias/eeuu/nota/markviveritounapersonaqueusaeselenguajecontraunamujernodeberiagobernarapuertorico-2504794/>.

    El Nuevo Día, “Raúl Maldonado denuncia una mafia institucional en Hacienda”, *El Nuevo Día*, 24 de junio de 2019, <https://www.elnuevodia.com/noticias/locales/nota/raulmaldonadodenunciaunamafiainstitucionalenhacienda-2501351/>.

    El “verano boricua” y los movimientos sociales, *Radio Universidad*, <https://www.mixcloud.com/radioupr/el-verano-boricua-y-los-movimientos-sociales-190730/>.

    El Vocero, “Rosselló: “Si el bully se acerca, le daré un puño en la boca”, *El Vocero*, 28 de marzo de 2019,

    <https://www.elvocero.com/gobierno/rossell-si-el-bully-se-acerca-le-dar-un-pu/article_05f8eb38-517e-11e9-bca1-db8b972afd91.html>

    Metro Puerto Rico, “Ricky Martin le pide la renuncia al gobernador. Martin se avergüenza de los líderes del país, 13 de julio de 2019,

    <https://www.metro.pr/pr/entretenimiento/2019/07/13/ricky-martin-se-averguenza-los-lideres-del-pais.html>.

    Negron Muntaner, The Emptying Island: Puerto Rican Expulsion in Post-Maria Time, emisférica, Vol. 14, 1, 2018.

    Noticel, “Una guía para las revelaciones del #TelegramGate”, 13 de julio de 2019, recuperado de

    <https://www.noticel.com/ahora/gobierno/una-guia-para-las-revelaciones-del-telegram/1094937599>

    Notiuno, “Jefe FBI ofrece "pon gratuito a la cárcel federal" a los corruptos”,

    <https://www.notiuno.com/noticias/seguridad-y-justicia/jefe-fbi-ofrece-pon-gratuito-a-la-c-rcel-federal/article_30bb3612-82fe-11e9-8546-9ba15957351a.html>

    NPR, “New Puerto Rico Governor Sworn in amid Political Chaos”, .

    Primera Hora, “Publican las 889 páginas del chat de Telegram”, *Primera Hora*,

    <https://www.primerahora.com/noticias/gobierno-politica/nota/publicanlas889paginasdelchatdetelegram-1352507/>.

    “Reacciona dueño de la humilde casa de la que se burla gobernador de Puerto Rico en chat”,

    [https://www.msn.com/es-us/noticias/estados-unidos/periodista-de-fox-confronta-a-ricardo-rossell%c3%b3-en-tensa-entrevista/reacciona-due%C3%B1o-de-la-humilde-casa-de-la-que-se-burla-gobernador-de-puerto-rico-en-chat/ar-AAECnSA](https://www.msn.com/es-us/noticias/estados-unidos/periodista-de-fox-confronta-a-ricardo-rosselló-en-tensa-entrevista/reacciona-dueño-de-la-humilde-casa-de-la-que-se-burla-gobernador-de-puerto-rico-en-chat/ar-AAECnSA). [↑](#endnote-ref-20)
